# Supplementary material for: Highly efficient carbon dot-based photoinitiating systems for 3D-VAT printing
Source: Royal Society of Chemistry journal article supplement (doi:10.1039/d3py00726j), 2023-01-01
Supplement: d3py00726j1.pdf [file d3py00726j1.pdf]

## SUPPLEMENTARY INFORMATION

# Highly efficient carbon dot–based photoinitiating systems for 3D-VAT printing

Dominika Krok<sup>a</sup>, Wiktoria Tomal<sup>a</sup>, Alexander J. Knight<sup>b</sup>, Alexander I. Tartakovskii<sup>b</sup>, Nicholas T.H. Farr<sup>c</sup>, Wiktor Kasprzyk<sup>a</sup>, Joanna Ortyl<sup>\*a,d,e</sup>

<sup>a</sup> Department of Biotechnology and Physical Chemistry, Faculty of Chemical Engineering and Technology, Cracow University of Technology, Warszawska 24, 30-155 Cracow, Poland

<sup>b</sup> Department of Physics and Astronomy, University of Sheffield, Sheffield, S3 7RH, UK.

<sup>c</sup> Department of Materials Science and Engineering, University of Sheffield, Sheffield S1 3JD, UK.

<sup>d</sup> Photo HiTech Ltd., Bobrzyńskiego 14, 30-348 Cracow, Poland

<sup>e</sup> Photo4Chem Ltd., Lea 114, 30-133 Cracow, Poland

\* Corresponding author: Joanna Ortyl  
e- mail: jortyl@pk.edu.pl  
ORCID iD: 0000-0002-4789-7199

## CONTENTS

### Synthesis of Carbon Dots

Table S1. One-pot “bottom-up” synthesis of carbon dots

Fig.S1. Structures of the monomers used for photopolymerization measurements and other additives.

Fig.S2. Scheme of synthesis of CA-CDs, CA-ED<sub>2</sub>-CDs, and CA-NH<sub>3</sub>-CDs

Fig.S3. Procedure for breaking agglomerates with NaOH solution

Fig. S4. The decrease in fluorescence due to leaching of the fluorophore from the solution and the resulting images of TLC plates with embedded solutions of the filtrates (a) CA-CDs, (b) CA-NH<sub>3</sub>-CDs, (c) CA-ED<sub>2</sub>-CDs

### Commercial Carbon Dots

Fig.S5. Powdered carbon dot materials from Sigma Aldrich.

### Analysis using the LC-DAD-MS system

Fig. S6. Analysis by LC-DAD-MS of synthesised (after purification) (1) CA-CDs, (2) CA-ED<sub>2</sub>-CDs, (3) CA-NH<sub>3</sub>-CDs and commercial carbon dots (4) GQDs

### XPS analysis

Fig.S7. Survey XPS spectrum of carbon dots from citric acid

Fig.S8. Survey XPS spectrum of carbon dots from citric acid and ammonia

Fig.S9. Survey XPS spectrum of carbon dots from citric acid and ethylenediamine

Fig.S10. Survey XPS spectrum of carbon dots from commercial carbon dots (GQDs)

Fig.S11. High resolution spectra of different peaks and analyzes for carbon dots from citric acid

Fig.S12. High resolution spectra of different peaks and analyzes for carbon dots from citric acid and ethylenediamine

Fig.S13. High resolution spectra of different peaks and analyzes for carbon dots from citric acid and ammonia

Fig.S14. High resolution spectra of different peaks and analyzes for commercial carbon dots (GQDs)

### Real-Time FT-IR photopolymerization experiments

Fig.S15. Initiating systems used in free-radical photopolymerization processes.

Fig.S16. Initiating systems used in free-radical photopolymerization processes of acrylate-water resin.

Fig.S17. (1) Ring designed to carry out photopolymerization processes (2) and the resulting hydrogel material after photopolymerization of the initiator system containing synthesized carbon dots.

Fig.S18. Intensity variation of the band at wavenumber 6164cm<sup>-1</sup> during measurement of the radical photopolymerization kinetics of the acrylate monomers studied

Table S2. Conversions obtained for acrylate monomer (TMPTA) during free radical photopolymerization after visible wavelength @405nm for different carbon dot-based initiating systems.

Table S3. Conversions obtained for acrylate monomer (HEA/WATER) during free radical photopolymerization after visible wavelength @405nm for different carbon dot-based initiating systems.

### Absorption and fluorescence spectra

Fig.S19. Excitation and emission spectra for determination of excited singlet state energies for citric acid carbon dots (a), for citric acid materials with ethylenediamine (b), and for citric acid materials with ammonia (c). The solvent is water.

Fig.S20. Excitation and emission spectra for determination of excited singlet state energies for carbon dots from Sigma Aldrich. The solvent is water.

### Cyclic voltammetry

Fig.S21. Cyclic voltammetry for the oxidation process ( $CV_{ox}$ , vs. Ag/AgCl) in aqueous solution (containing 0.1 M KCl) for citric acid dots (a) for citric acid dots doped with ethylenediamine (b) and for citric acid dots doped with ammonia (c).

Fig.S22. Cyclic voltammetry for the reduction process ( $CV_{ox}$ , vs. Ag/AgCl) in aqueous solution (containing 0.1 M KCl) for citric acid dots (a) for citric acid dots doped with ethylenediamine (b) and for citric acid dots doped with ammonia (c).

Fig.S23. Cyclic voltammetry for the oxidation process ( $CV_{ox}$ , vs. Ag/AgCl) in aqueous solution (containing 0.1 M KCl) for commercial carbon dots from Sigma Aldrich.

Fig.S24. Cyclic voltammetry for the reduction process ( $CV_{ox}$ , vs. Ag/AgCl) in aqueous solution (containing 0.1 M KCl) for commercial carbon dots from Sigma Aldrich

### 3D printing experiments

Fig.S25. A 3D material made by free-radical photopolymerization of an TMPTA/PEGDA mixture (1/1 wt. %) in the presence of a three-component photoinitiating system based on CA-ED<sub>2</sub>-CDs (0.2 wt. %), IOD (2 wt. %) and MDEA (2 wt. %).

Fig.S26. s-SNOM amplitude data taken simultaneously with the data in Figure 17 in the main text, with incident illumination at 1490 cm<sup>-1</sup>. The data was demodulated at the 3rd harmonic of the AFM tapping frequency to reduce the influence of background effects, and the data has been normalised to the maximum recorded value.

Fig.S27. A 3D hydrogel material made by free-radical photopolymerization of an HEA/water mixture (1/1 wt. %) in the presence of a ternary photoinitiating system based on CA-NH<sub>3</sub>-CDs(0.2 wt. %) and IOD (2 wt. %).

Fig.S28. A printout made by photopolymerization of a HDDA/PEGDA/WATER (40/40/20 wt%) mixture in the presence of N-phenylglycine (2 wt%).

### Bibliography

## Synthesis of Carbon Dots

Table S1. One-pot "bottom-up" synthesis of carbon dots

| Carbon dots             | Reagents                      | Reaction terms | 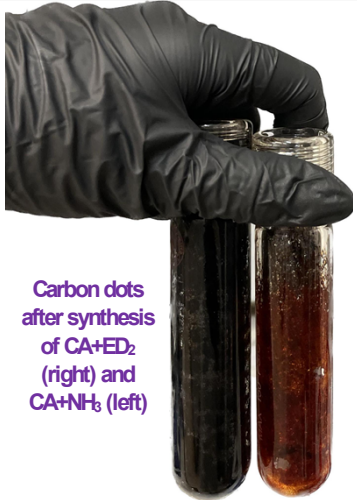 |
|-------------------------|-------------------------------|----------------|-------------------------------------------------------------------------------------|
| CA-CDs                  | citric acid                   | 230°C, 5h      |                                                                                     |
| CA-ED <sub>2</sub> -CDs | citric acid + ethylenediamine |                |                                                                                     |
| CA-NH <sub>3</sub> -CDs | citric acid + ammonia         |                |                                                                                     |

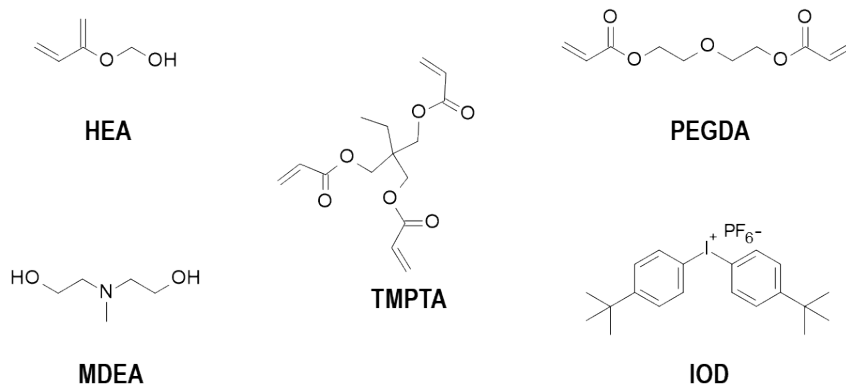

Fig.S1. Structures of the monomers used for photopolymerization measurements and other additives.

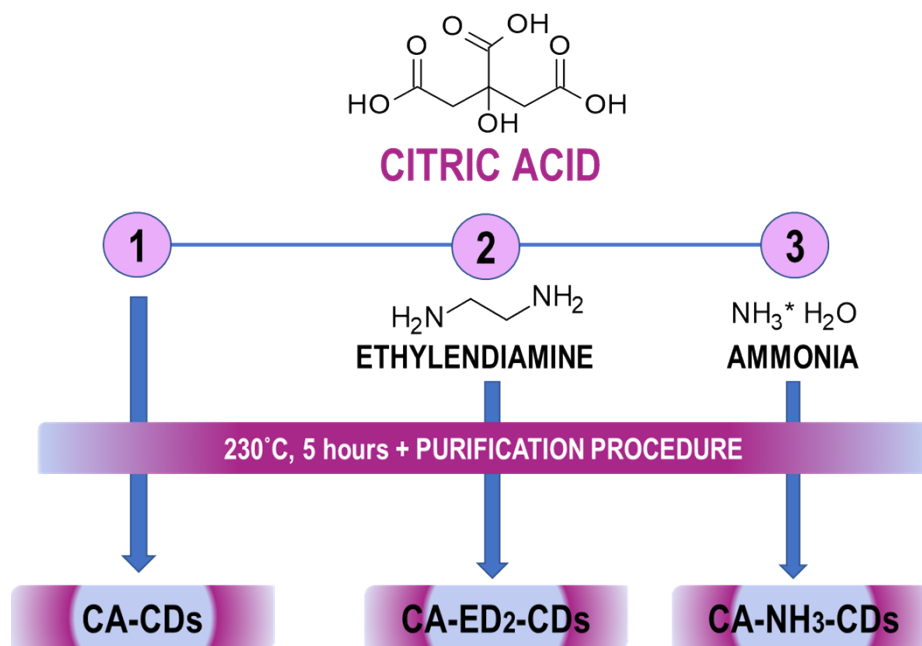

Fig.S2. Scheme of synthesis of CA-CDs, CA-ED<sub>2</sub>-CDs, and CA-NH<sub>3</sub>-CDs.

#### Purification of synthesis materials

During the synthesis of carbon dots by hydrothermal methods, fluorophores can be formed. In a previous article<sup>1</sup> it was shown that purification of carbon dots is an extremely important research step. In view of the fact that the purification procedure using the phalcons with a 10,000 kDa membrane presented in the paper was effective in the present study was also applied.

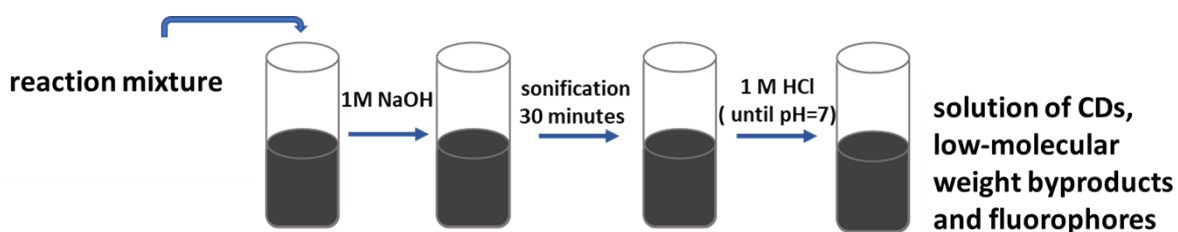

Fig.S3. Procedure for breaking agglomerates with NaOH solution

## Spectroscopic characteristics of filtrates

The below graphs showed the high quality purification of the synthesized materials and the separation of fluorophores from valuable carbon dots used in further studies.

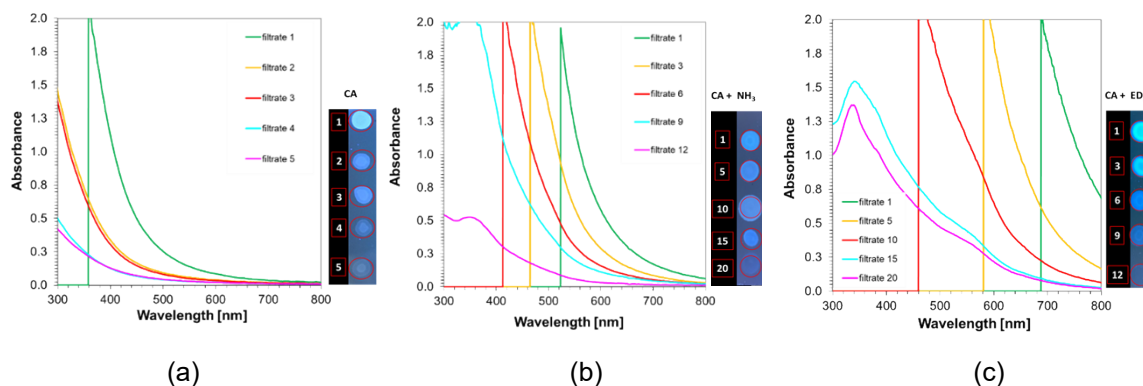

Fig. S4. The decrease in fluorescence due to leaching of the fluorophore from the solution and the resulting images of TLC plates with embedded solutions of the filtrates (a) CA-CDs, (b) CA-NH<sub>3</sub>-CDs, (c) CA-ED<sub>2</sub>-CDs

## Commercial Carbon Dots (GQDs)

In addition to synthesized carbon dots, commercially available dots were used for the study. The commercially available dots were purchased from Sigma Aldrich. The form in which the mentioned materials appeared was a solid powder of brown color.

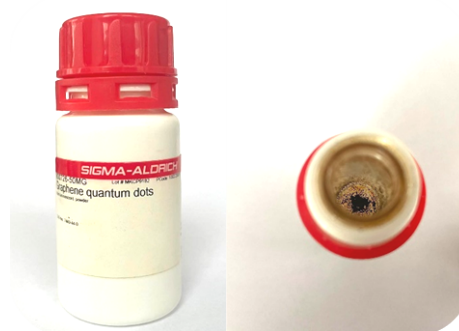

Fig.S5. Powdered carbon dot materials from Sigma Aldrich.

Analysis using the LC-DAD-MS system

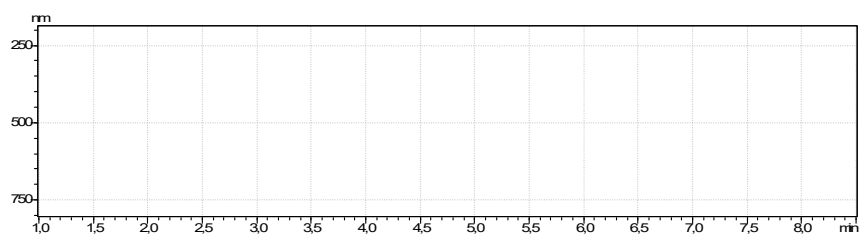

(1)

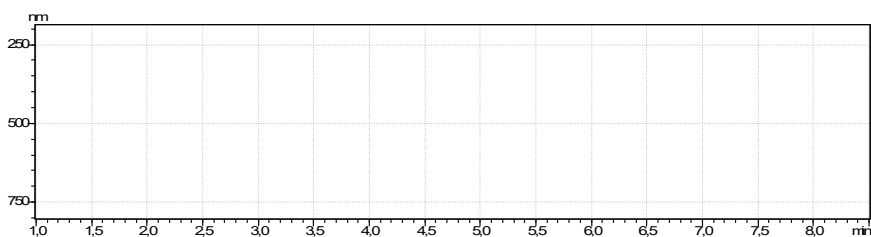

(2)

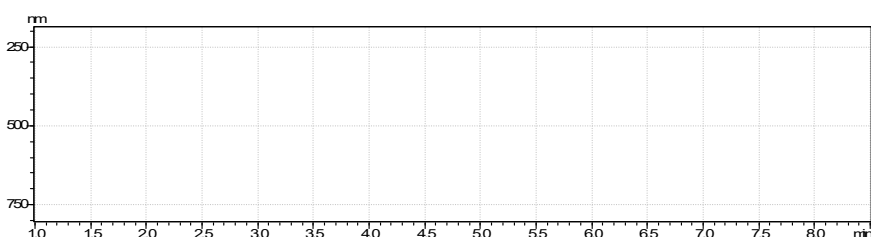

(3)

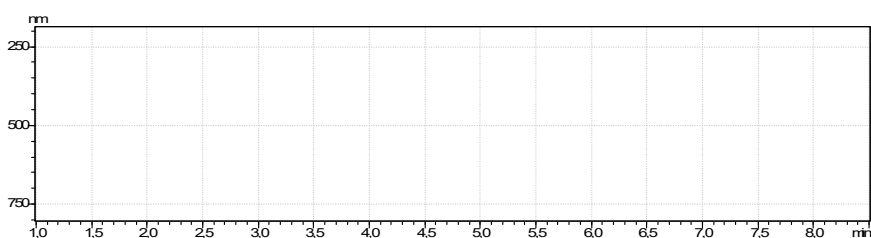

(4)

Fig. S6. Analysis by LC-DAD-MS of synthesised (after purification) (1) CA-CDs, (2) CA-ED<sub>2</sub>-CDs, (3) CA-NH<sub>3</sub>-CDs and commercial carbon dots (4) GQDs

## XPS analysis

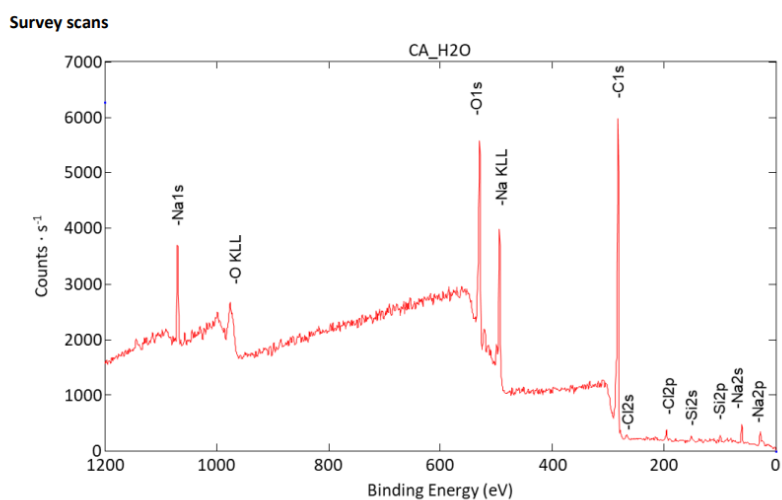

Fig.S7. Survey XPS spectrum of carbon dots from citric acid

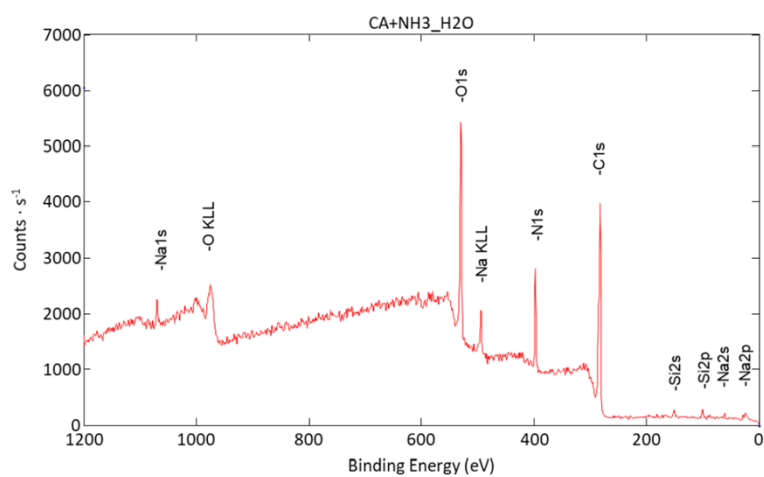

Fig.S8. Survey XPS spectrum of carbon dots from citric acid and ammonia

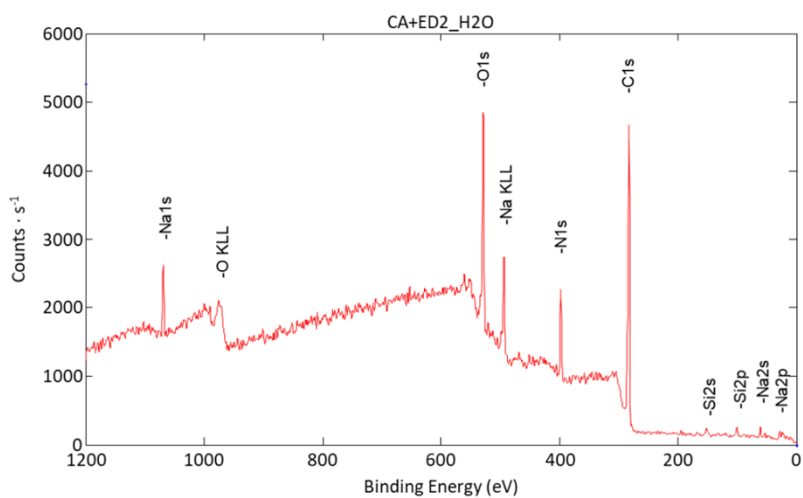

Fig.S9. Survey XPS spectrum of carbon dots from citric acid and ethylenediamine



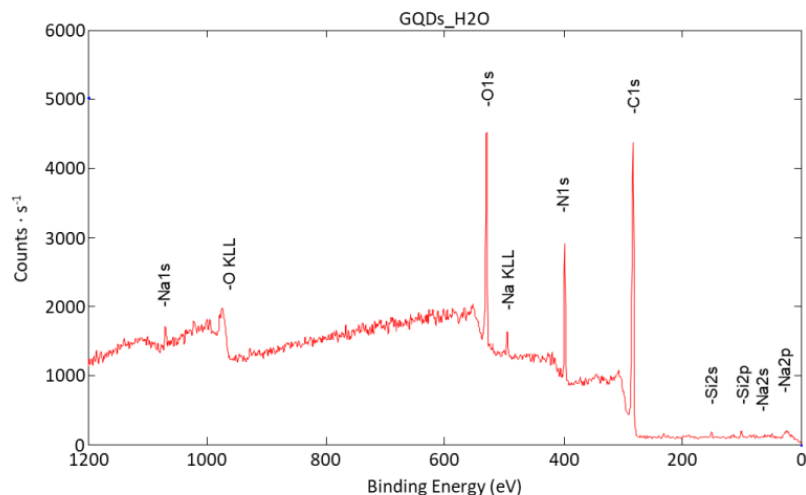

Fig.S10. Survey XPS spectrum of carbon dots from commercial carbon dots (GQDs)

The N 1s spectra were fitted with single line centered at 399.9 eV which indicate presence of either C-NH and/or N-(C=O) type bonds in organic compounds<sup>2</sup>. The Na 1s spectra were fitted with single line centered at 1071.6 eV which indicate Na<sup>+</sup> oxidation state of sodium<sup>3</sup>. The Cl 2p spectra were fitted with doublet structure (doublet separation  $p_{3/2} - p_{1/2}$  equals 1.6 eV) with  $2p_{3/2}$  line centered at 198.4 eV which indicate presence of Cl ions in chlorides<sup>4</sup>. The Si 2p spectra show two doublet structures (doublet separation  $p_{3/2} - p_{1/2}$  equals 0.6 eV) with first  $2p_{3/2}$  line centered at 101.9 eV which indicate C-Si-O type compounds like in e.g. siloxanes or silicones and second  $2p_{3/2}$  line centered at 103.2 eV which indicate presence of SiO<sub>2</sub> type compound<sup>5</sup>. As for the presence of silicon compounds, they often appear on XPS analyses and probably originate from PDMS, but do not affect the value of the results obtained.

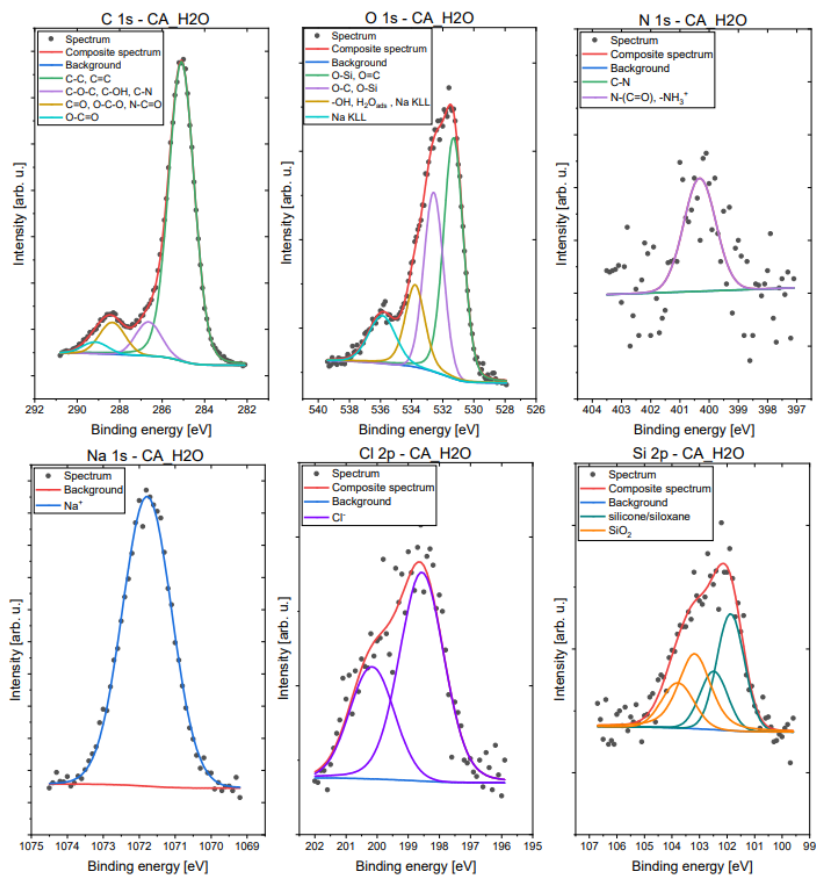

Fig.S11. High resolution spectra of different peaks and analyzes for carbon dots from citric acid

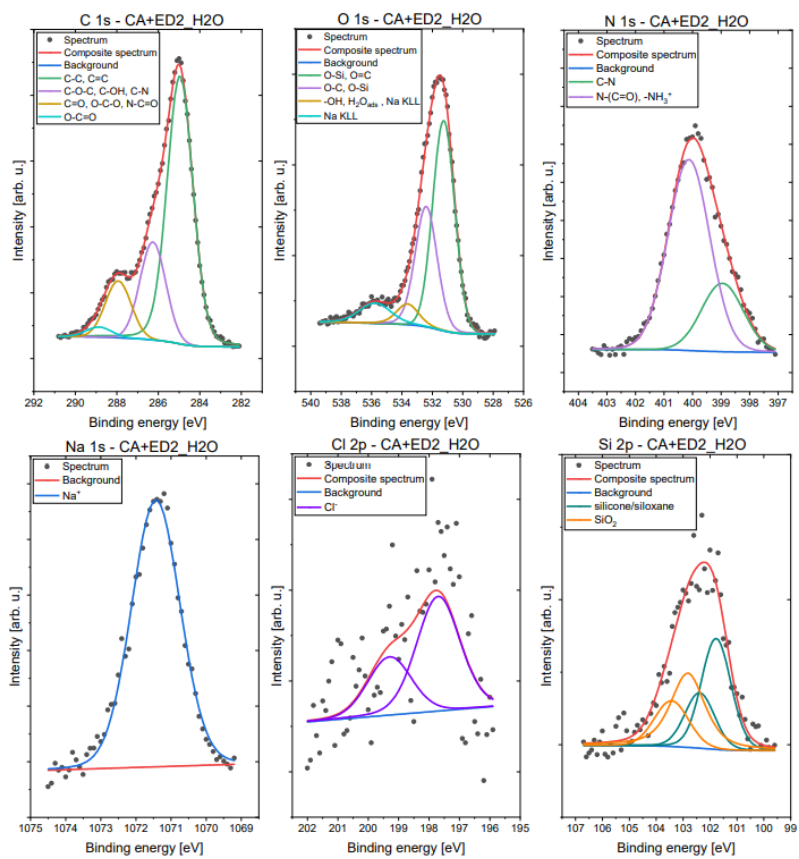

Fig.S12. High resolution spectra of different peaks and analyzes for carbon dots from citric acid and ethylenediamine

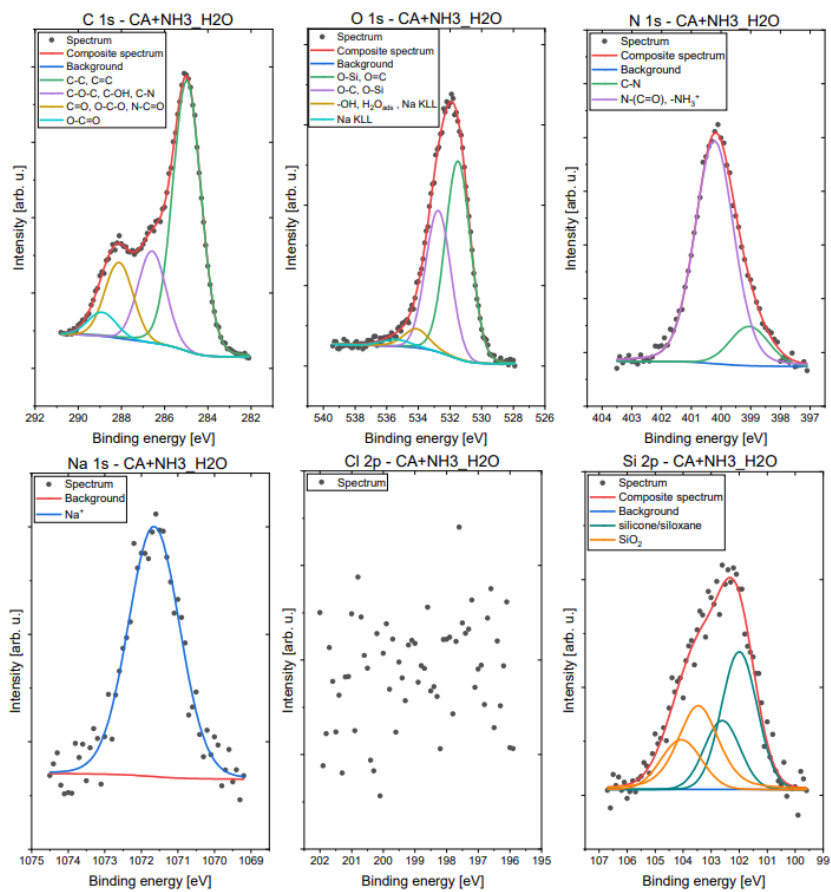

Fig.S13. High resolution spectra of different peaks and analyzes for carbon dots from citric acid and ammonia

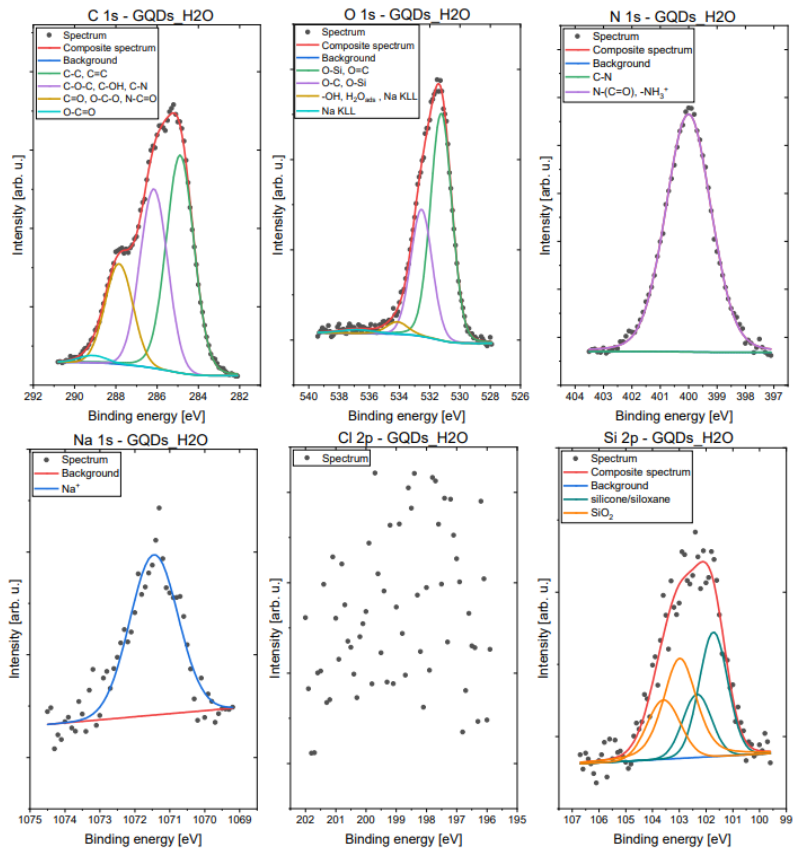

Fig.S14. High resolution spectra of different peaks and analyzes for commercial carbon dots (GQDs)

## Real-Time FT-IR photopolymerization experiments

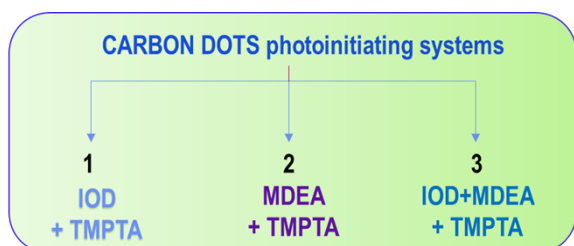

Fig.S15. Initiating systems used in free-radical photopolymerization processes.

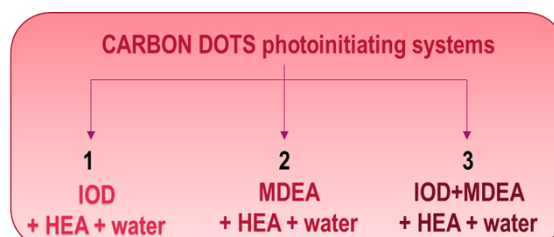

Fig.S16. Initiating systems used in free-radical photopolymerization processes of acrylate-water resin.

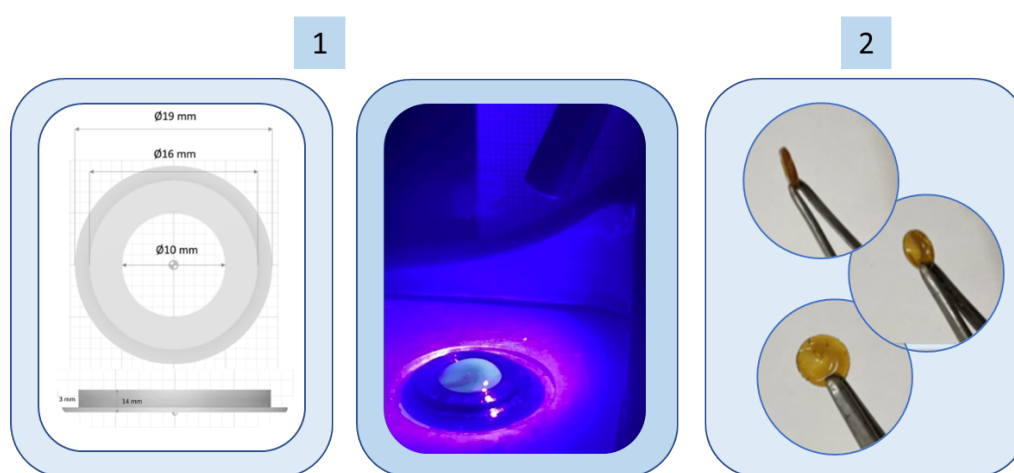

Fig.S17. (1) Ring designed to carry out photopolymerization processes (2) and the resulting hydrogel material after photopolymerization of the initiator system containing synthesized carbon dots.

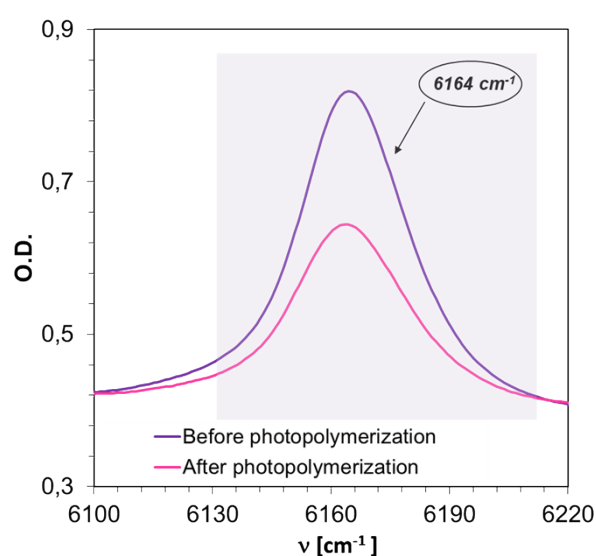

Fig.S18. Intensity variation of the band at wavenumber  $6164\text{ cm}^{-1}$  during measurement of the radical photopolymerization kinetics of the acrylate monomers studied

Free-radical photopolymerization of acrylate monomers and hydrogel formulations in two and three initiating systems based on Carbon Dots.

Table S2. Conversions obtained for acrylate monomer during free radical photopolymerization after visible wavelength @405nm for different carbon dot-based initiating systems.

| Bulk photopolymerization of ACRYLATE monomer monitored at ~ 6164 cm <sup>-1</sup> |                             |                                                                                                           |
|-----------------------------------------------------------------------------------|-----------------------------|-----------------------------------------------------------------------------------------------------------|
| Type of carbon dots                                                               | Ingredients of compositions | Conversion [%]<br>@405nm<br>current = 1.4 A<br>power out = 1.50 W<br>irradiance = 22.0 cW/cm <sup>2</sup> |
| CA-CDs                                                                            | IOD+TMPTA                   | 8                                                                                                         |
|                                                                                   | MDEA+TMPTA                  | 3                                                                                                         |
|                                                                                   | IOD+MDEA+TMPTA              | 100                                                                                                       |
| CA-NH <sub>3</sub> -CDs                                                           | IOD+TMPTA                   | 31                                                                                                        |
|                                                                                   | MDEA+TMPTA                  | 6                                                                                                         |
|                                                                                   | IOD+MDEA+TMPTA              | 64                                                                                                        |
| CA-ED <sub>2</sub> -CDs                                                           | IOD+TMPTA                   | 83                                                                                                        |
|                                                                                   | MDEA+TMPTA                  | 9                                                                                                         |
|                                                                                   | IOD+MDEA+TMPTA              | 64                                                                                                        |
| GQDs                                                                              | IOD+TMPTA                   | 20                                                                                                        |
|                                                                                   | MDEA+TMPTA                  | 5                                                                                                         |
|                                                                                   | IOD+MDEA+TMPTA              | 50                                                                                                        |
| References                                                                        | IOD+TMPTA                   | 8                                                                                                         |
|                                                                                   | MDEA+TMPTA                  | 1                                                                                                         |
|                                                                                   | IOD+MDEA+TMPTA              | 26                                                                                                        |

Photocatalytic properties of carbon dots during free-radical polymerization of the water-based coating hydrogel

Table S3. Conversions obtained for acrylate monomer during free radical photopolymerization dedicated to obtain hydrogels after visible wavelength @405nm for different carbon dot-based initiating systems.

| Free-radical photopolymerization of HEA/WATER monomer (1:1 wt. %) mixture, monitored at ~6164 cm <sup>-1</sup> |                             |                                                                                                           |
|----------------------------------------------------------------------------------------------------------------|-----------------------------|-----------------------------------------------------------------------------------------------------------|
| Type of carbon dots                                                                                            | Ingredients of compositions | Conversion [%]<br>@405nm<br>current = 1.4 A<br>power out = 1.50 W<br>irradiance = 22.0 cW/cm <sup>2</sup> |
| CA-CDs                                                                                                         | IOD+TMPTA                   | 48                                                                                                        |
|                                                                                                                | MDEA+TMPTA                  | 16                                                                                                        |
|                                                                                                                | IOD+MDEA+TMPTA              | 100                                                                                                       |
| CA-NH <sub>3</sub> -CDs                                                                                        | IOD+TMPTA                   | 23                                                                                                        |
|                                                                                                                | MDEA+TMPTA                  | 17                                                                                                        |
|                                                                                                                | IOD+MDEA+TMPTA              | 100                                                                                                       |
| CA-ED <sub>2</sub> -CDs                                                                                        | IOD+TMPTA                   | 26                                                                                                        |
|                                                                                                                | MDEA+TMPTA                  | 4                                                                                                         |
|                                                                                                                | IOD+MDEA+TMPTA              | 97                                                                                                        |
| GQDs                                                                                                           | IOD+TMPTA                   | 80                                                                                                        |

|            |                |    |
|------------|----------------|----|
| References | MDEA+TMPTA     | 20 |
|            | IOD+MDEA+TMPTA | 91 |
|            | IOD+TMPTA      | 3  |
|            | MDEA+TMPTA     | 6  |
|            | IOD+MDEA+TMPTA | 73 |

Absorption and fluorescence spectra for the determination of the excited singlet state energy for investigated of carbon dots in water

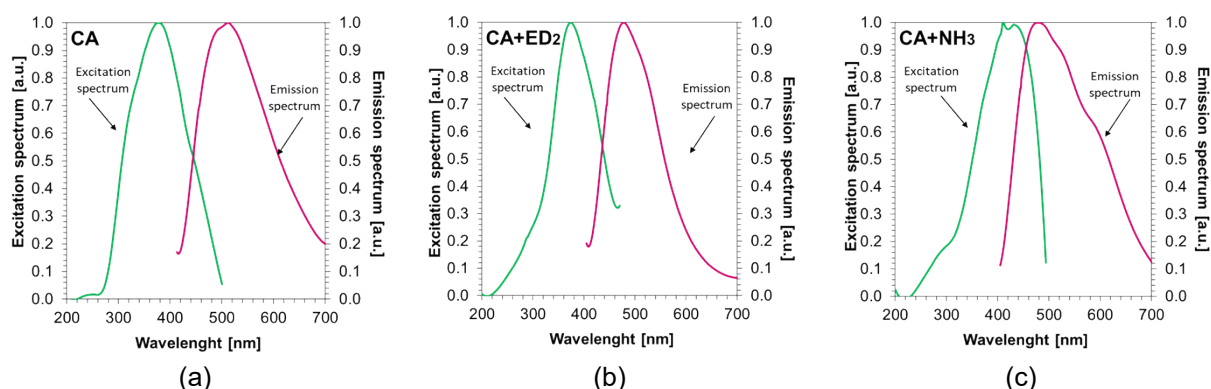

Fig.S19. Excitation and emission spectra for determination of excited singlet state energies for citric acid carbon dots (a), for citric acid materials with ethylenediamine (b), and for citric acid materials with ammonia (c). The solvent is water.

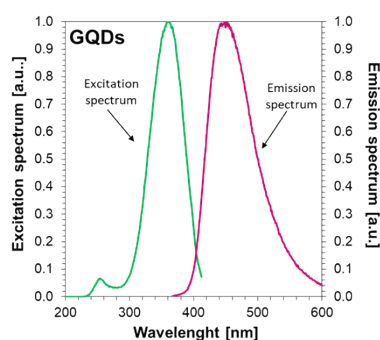

Fig.S20. Excitation and emission spectra for determination of excited singlet state energies for carbon dots from Sigma Aldrich. The solvent is water.



Cyclic voltammetry profiles showing oxidation and reduction processes of carbon materials in water.

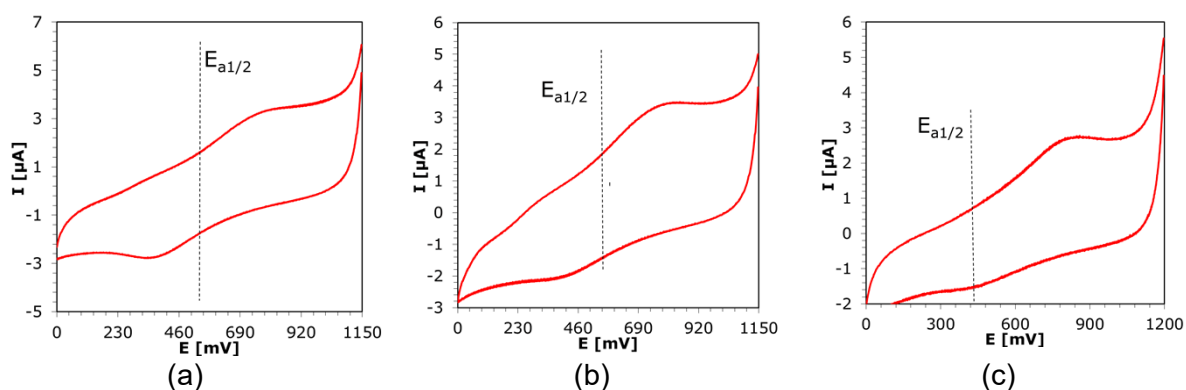

Fig.S21. Cyclic voltammetry for the oxidation process ( $CV_{ox}$ , vs. Ag/AgCl) in aqueous solution (containing 0.1 M KCl) for citric acid dots (a) for citric acid dots doped with ethylenediamine (b) and for citric acid dots doped with ammonia (c).

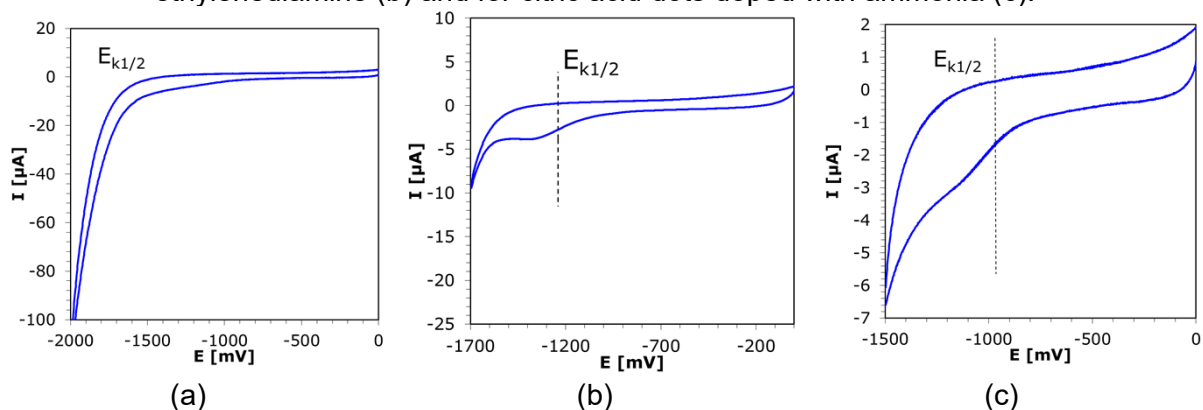

Fig.S22. Cyclic voltammetry for the reduction process ( $CV_{ox}$ , vs. Ag/AgCl) in aqueous solution (containing 0.1 M KCl) for citric acid dots (a) for citric acid dots doped with ethylenediamine (b) and for citric acid dots doped with ammonia (c).

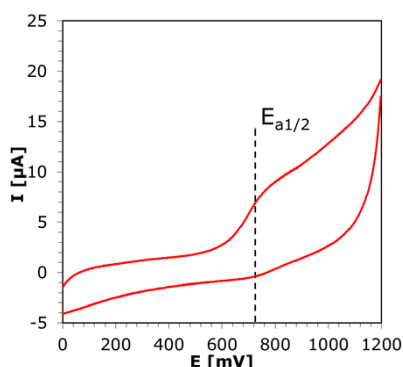

Fig.S23. Cyclic voltammetry for the oxidation process ( $CV_{ox}$ , vs. Ag/AgCl) in aqueous solution (containing 0.1 M KCl) for commercial carbon dots from Simga Aldrich.

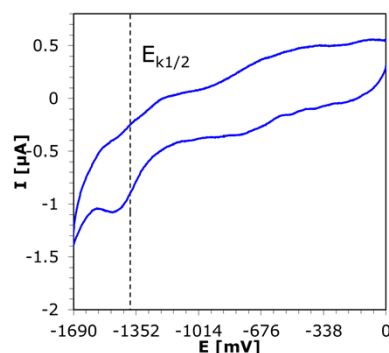

Fig.S24. Cyclic voltammetry for the reduction process ( $CV_{ox}$ , vs. Ag/AgCl) in aqueous solution (containing 0.1 M KCl) for commercial carbon dots from Simga Aldrich.

Table.S4. Electrochemical and thermodynamic properties of carbon dots in the photo-oxidation and photo-reduction mechanisms

| Carbon Dots          | E <sub>00</sub> [eV] | Foto-oxidation                  |                       | Foto-reduction                   |                       |
|----------------------|----------------------|---------------------------------|-----------------------|----------------------------------|-----------------------|
|                      |                      | E <sub>ox</sub> vs Ag/AgCl [mV] | ΔG <sub>et</sub> [eV] | E <sub>red</sub> vs Ag/AgCl [mV] | ΔG <sub>et</sub> [eV] |
| CA                   | 2,78                 | 549                             | -1,59                 | *                                | <i>no</i>             |
| CA +ED <sub>2</sub>  | 2,84                 | 580                             | -1,62                 | -1241                            | -0,73                 |
| CA + NH <sub>3</sub> | 2,72                 | 544                             | -1,54                 | -937                             | -0,92                 |
| GQDs                 | 3,08                 | 726                             | -1,71                 | -1383                            | -0,83                 |

calculated using the Rehm-Weller equation:  $\Delta G_{et} = F[E_{ox}(D/D^+) - E_{red}(A^-/A)] - Ze^2/\epsilon a - E_{00}$

E<sub>ox</sub> (D/D<sup>+</sup>) - electron donor oxidation potential (0.864 vs, Ag/AgCl for MDEA amine)

E<sub>red</sub> (A<sup>-</sup>/A) - electron acceptor reduction potential (-0.68V vs, Ag/AgCl for IOD idonium salt)

E<sub>00</sub> - transition energy 00 for the singlet state

\*no signal detected at given measurement parameters

no - no calculation

## 3D printing experiments

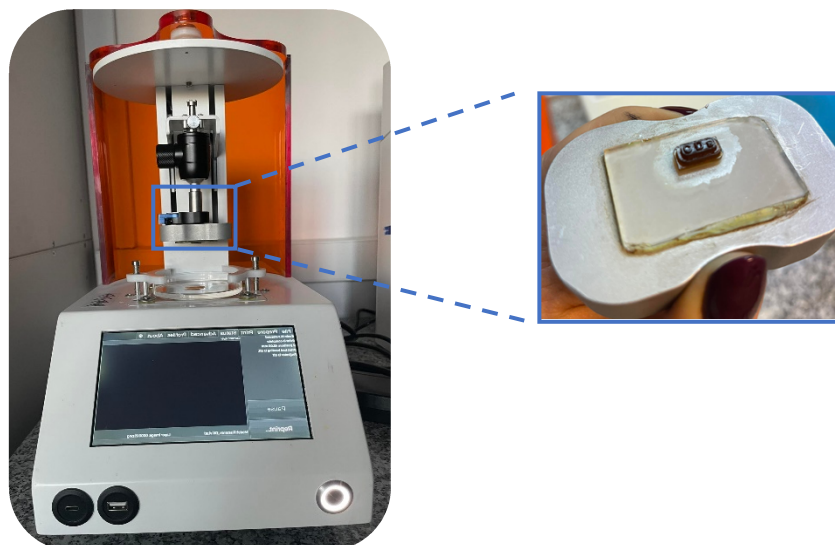

Fig.S25. A 3D material made by free-radical photopolymerization of an TMPTA/PEGDA mixture (1/1 wt. %) in the presence of a three-component photoinitiating system based on CA-ED<sub>2</sub>-CDs (0.2 wt. %), IOD (2 wt. %) and MDEA (2 wt. %).

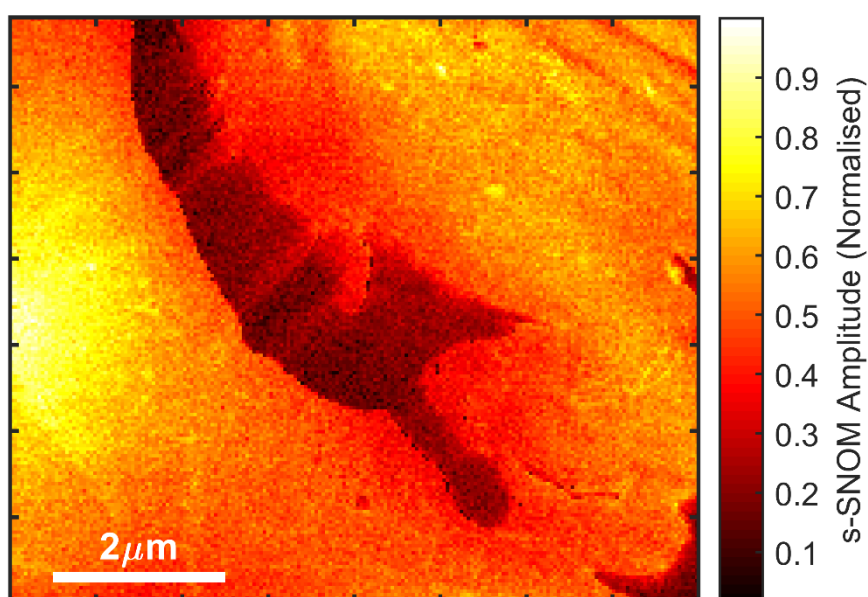

Fig.S26. s-SNOM amplitude data taken simultaneously with the data in Figure 17 in the main text, with incident illumination at 1490 cm<sup>-1</sup>. The data was demodulated at the 3rd harmonic of the AFM tapping frequency to reduce the influence of background effects, and the data has been normalised to the maximum recorded value.

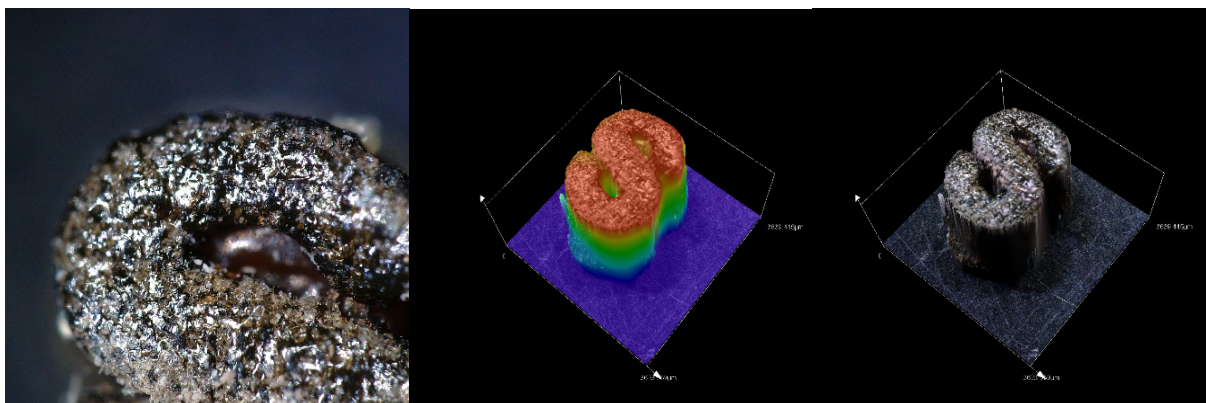

Fig.S27. A 3D hydrogel material made by free-radical photopolymerization of an HEA/water mixture (1/1 wt. %) in the presence of a ternary photoinitiating system based on CA-NH<sub>3</sub>-CDs(0.2 wt. %) and IOD (2 wt. %).

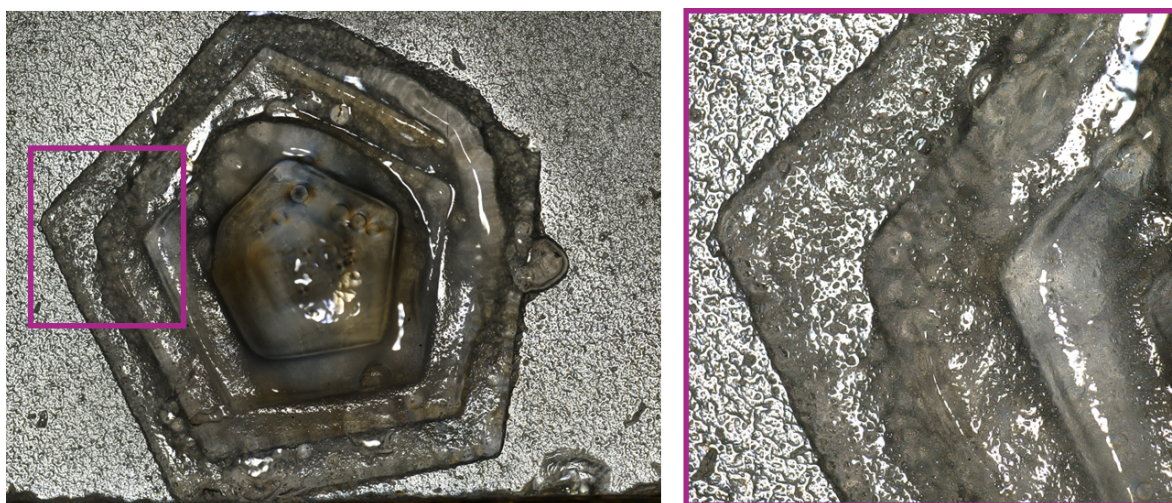

Fig.S28. A printout made by photopolymerization of a HDDA/PEGDA/WATER (40/40/20 wt%) mixture in the presence of N-phenylglycine (2 wt%). Printing parameters: layer thickness – 100um, time to cure 1<sup>st</sup> layer – 45 s, time to cure layer – 15 s.

## Bibliography

- 1 W. Tomal, T. Świergosz, M. Pilch, W. Kasprzyk and J. Ortyl, *Polym Chem*, 2021, 12, 3661–3676.
- 2 D. Briggs, *Surface Analysis of Polymers by XPS and Static SIMS*, Cambridge University Press, 1998.
- 3 R. Dedryvère, M. Maccario, L. Croguennec, F. le Cras, C. Delmas and D. Gonbeau, *Chemistry of Materials*, 2008, 20, 7164–7170.
- 4 P. G. Rouxhet and M. J. Genet, *Surface and Interface Analysis*, 2011, 43, 1453–1470.
- 5 Wagner C.D., *J.Vac.Sci.Technol.*, 1982, 21, 933–944.
